# Supplementary material for: Conservation of resources theory and research use in health systems
Source: Implement Sci. 2010 Oct 20;5:79. doi: 10.1186/1748-5908-5-79 (PMC2978118; doi:10.1186/1748-5908-5-79)
Supplement: Additional file 1 — Table s1: Taxonomy of organizational resources required for research use. [file 1748-5908-5-79-S1.DOCX]

| **Table 2. Taxonomy of organizational resources required for research use** | | | |
| --- | --- | --- | --- |
|  | | | |
|  |  |  | Organizational Culture |
|  | 1.1 |  | Formal and/or Informal Policy and Practice |
|  |  | 1.1.1 | Recruitment and retention of innovatorsa [108-110] |
|  |  | 1.1.2 | Positive recognition of innovatorsa[111-114] |
|  |  | 1.1.3 | Incentives to engage in research use activitiesab [115-121] |
|  |  | 1.1.4 | Regular evaluation of policies and/or practices based on research evidenceab [121-132] |
|  |  | 1.1.5 | Research use is a key component of policy and practiceab [133-141] |
|  |  | 1.1.6 | Investment in research use activitiesab [142-150] |
|  |  | 1.1.7 | Participation in researchab [151-161] |
|  |  | 1.1.8 | Interactions between researchers and usersab [162-188] |
|  |  | 1.1.9 | Involvement in decision makingab [189-192] |
|  | 1.2 |  | Training to Use Research Evidence |
|  |  | 1.2.1 | Training opportunities in research usea [193-196] |
|  | 1.3 |  | Access to Research Evidence |
|  |  | 1.3.1 | Access to research evidencea [197-207] |
|  | 1.4 |  | Organizational Leadership |
|  |  | 1.4.1 | Leadership in research useab [208-218] |
|  |  | 1.4.2 | Management support for research informed changeab [219-228] |
|  | 1.5 |  | Organizational Flexibility |
|  |  | 1.5.1 | Flexibility in the organizational structure to make changes and/or reallocate resources based on research evidencec |
|  | 1.6 |  | Organizational Buy-In |
|  |  | 1.6.1 | Buy-in at the organizational levelab [229-231] |
|  |  | 1.6.2 | Shared beliefs about the value of researchc |
|  | 1.7 |  | Organizational History |
|  |  | 1.7.1 | Organizational history of prior successes stemming from research useab [232-234] |
|  |  |  | Human Resources |
|  | 2.1 |  | Personal Characteristics |
|  |  | 2.1.1 | Motivation/vested interest in research use activitiesab [235] |
|  |  | 2.1.2 | Information seekinga [236] |
|  |  | 2.1.3 | Trust in research(ers) ab [237-238] |
|  |  | 2.1.4 | Receptivity to ideas and collaborationab [239-240] |
|  |  | 2.1.5 | Research evidence is not perceived to be a threatab [241-248] |
|  |  | 2.1.6 | Early adoptersa [249-252] |
|  |  | 2.1.7 | Perceived benefit of research use (for self or organization) ab [253-255] |
|  |  | 2.1.8 | Perceived match between organizational priorities and research evidenceab [256-260] |
|  |  | 2.1.9 | Perceived need to act on research evidencec |
|  |  | 2.1.10 | Openness/receptivity to research, innovation, and changeab [261-273] |
|  |  | 2.1.11 | Perceived reliability and validity of the research evidenceab [274] |
|  |  | 2.1.12 | Willingness to cooperate with the implementation of new research evidence (even if it contradicts prior practice) c |
|  |  | 2.1.13 | Satisfaction with prior research usec |
|  |  | 2.1.14 | Perceived generalizability of the research evidence to the organizationc |
|  |  | 2.1.15 | Flexible administratorsa [275-277] |
|  | 2.2 |  | Skills/Qualifications |
|  |  | 2.2.1 | Skills to acquire, assess, and apply research to the local contextab [278-296] |
|  |  | 2.2.2 | Knowledge and understanding of researchab [297,298] |
|  |  | 2.2.3 | Ability to network/communicate with othersab [299] |
|  |  | 2.2.4 | Training, education and research in applied social sciences or relevant fielda [300, 301] |
|  |  | 2.2.5 | Skills at evaluationab [302] |
|  |  | 2.2.6 | Team building skillsab [303] |
|  |  | 2.2.7 | Awareness of research evidencea [304-307] |
|  | 2.3 |  | Activities |
|  |  | 2.3.1 | Participation in decision makingab [308-310] |
|  |  | 2.3.2 | Participation in researcha [311, 312] |
|  |  | 2.3.3 | Read publications/professional journalsa [313] |
|  | 2.4 |  | Presence of Change Agents |
|  |  | 2.4.1 | Person(s) to coordinate/ manage/ facilitate changeab [314-316] |
|  |  | 2.4.2 | Presence of a knowledge brokerab [317-329] |
|  |  | 2.4.3 | Presence of an advocate/ champion/ opinion leader to influence changea [330-342] |
|  |  | 2.4.4 | Leadershipab [343-345] |
|  |  | 2.4.5 | Expertisea [346] |
|  |  | 2.4.6 | Absence of a gatekeeper(s) who prevent(s) research usea [347-348] |
|  | 2.5 |  | Staffing |
|  |  | 2.5.1 | Low staff turnoverab [349-350] |
|  |  | 2.5.2 | Manageable workloadab [351-353] |
|  |  | 2.5.3 | Sufficient staff ab [354-358] |
|  |  |  | Economic Resources |
|  | 3.1 |  | Budget Constraints |
|  |  | 3.1.1 | Sufficient money to cover the costs of acquiring evidencea [359] |
|  |  | 3.1.2 | Sufficient money to implement and sustain evidence-based changea [360-369] |
|  |  | 3.1.3 | Limited costs associated with evidence based change and/or realization of potential economic efficiencies from implementing new research evidencec |
|  | 3.2 |  | Spending Flexibility |
|  |  | 3.2.1 | Slack resources/Flexibility to reallocate funds/discretionary spending/ Maintenance or redirection of financial reserves toward research useab [370-378] |
|  | 3.3 |  | Financial Investment in Research Use Activities |
|  |  | 3.3.1 | Economic incentives to produce researcha [379-386] |
|  |  | 3.3.2 | Financial investment in research related resources and activitiesa [387] |
|  | 3.4 |  | Economic Dependency |
|  |  | 3.4.1 | Economic dependency (from outside sources) a [388] |
|  |  |  |  |
|  |  |  | Condition Resources |
|  | 4.1 |  | Time/Timing |
|  |  | 4.1.1 | Timing of research relative to events in the user systemab [389, 390] |
|  |  | 4.1.2 | Time to acquire, assess, assimilate, and implement new research evidenceab [391-402] |
|  | 4.2 |  | Absence of Conflict/Competition |
|  |  | 4.2.1 | Limited conflict concerning research usec |
|  |  | 4.2.2 | Limited competition for scarce resources within the organizationc |
|  |  | 4.2.3 | Decreased potential for further loss resulting from research usec |
|  |  | 4.2.4 | Not operating in crisis management modec |
|  | 4.3 |  | Opportunity |
|  |  | 4.3.1 | Presence of a catalyst (crisis or innovation) that heightens the need for change triggers community dialogueab [403-408] |
|  |  | 4.3.2 | Organizational stabilityab [409-411] |
|  |  | 4.3.3 | Momentumab [412] |
| Note: Items with the subscript a were identified by the literature scan. Items with the subscript ab were identified by interview participants in the multiple case study and are consistent with those identified in the literature. Items with the subscript c are new items identified by interview participants in the multiple case study. | | | |
